# Supplementary material for: Ge@C core–shell nanostructures for improved anode rate performance in lithium-ion batteries
Source: Royal Society of Chemistry journal article supplement (doi:10.1039/c4ra16242k), 2015-01-01
Supplement: c4ra16242k1.pdf [file c4ra16242k1.pdf]

**Electronic supplementary information for**  
**Ge@C Core-Shell Nanostructures for Improved Anode Rate Performance in**  
**Lithium-Ion Batteries**

Tingting Qiang,<sup>a</sup> Jiaxin Fang,<sup>a</sup> Yixuan Song,<sup>a</sup> Qiuyang Ma,<sup>a</sup> Ming Ye,<sup>a</sup> Zhen Fang,  
\*<sup>a</sup> and Baoyou Geng\*<sup>a</sup>

<sup>a</sup> Key Laboratory of Functional Molecular Solids, Ministry of Education. Center for Nano Science and Technology. College of Chemistry and Materials Science, Anhui Normal University, Wuhu, 241000, P. R. China; E-mail: fzfsn@mail.ahnu.edu.cn, bygeng@mail.ahnu.edu.cn.

**Characterization details**

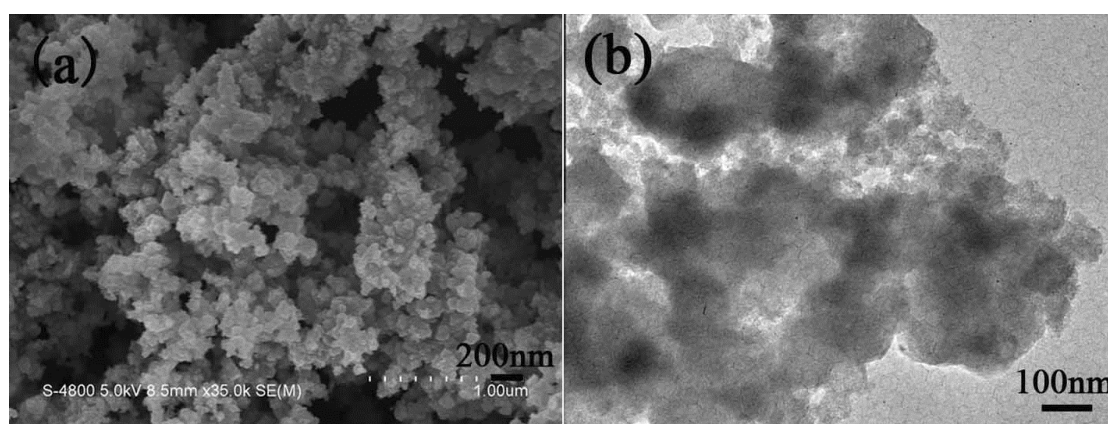

**Fig. S1.** (a) SEM image of Ge NPs. (b) TEM images of Ge NPs.

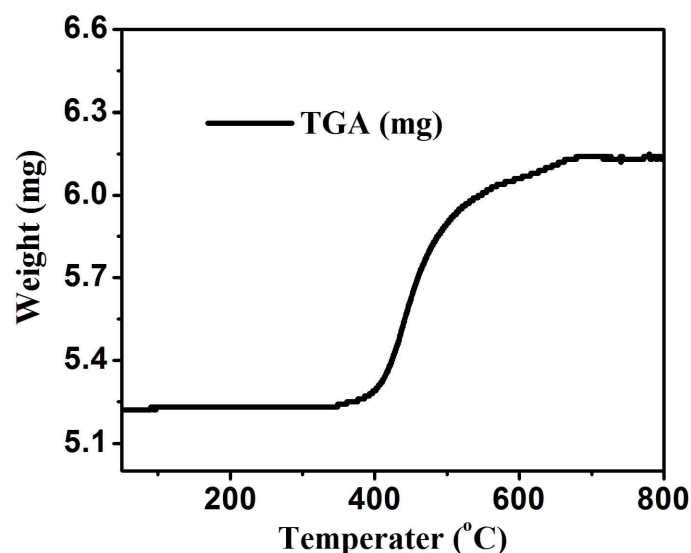

**Fig. S2.** TGA curves of the Ge@C nanocomposites.

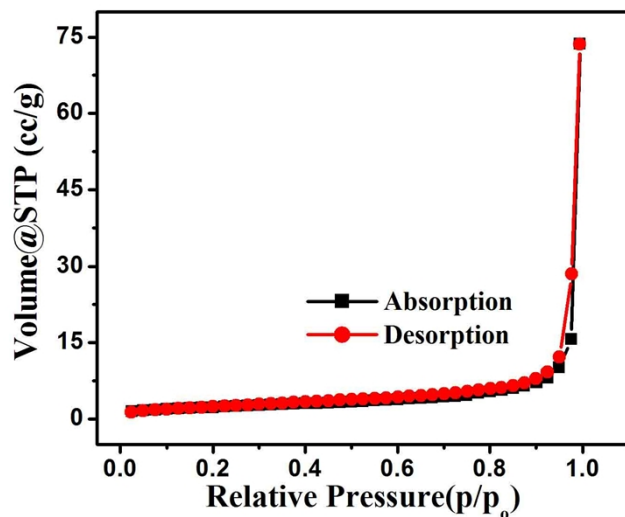

**Fig. S3.** N<sub>2</sub> adsorption/desorption isotherms and pore-size distribution curves of Ge@C nanocomposites.

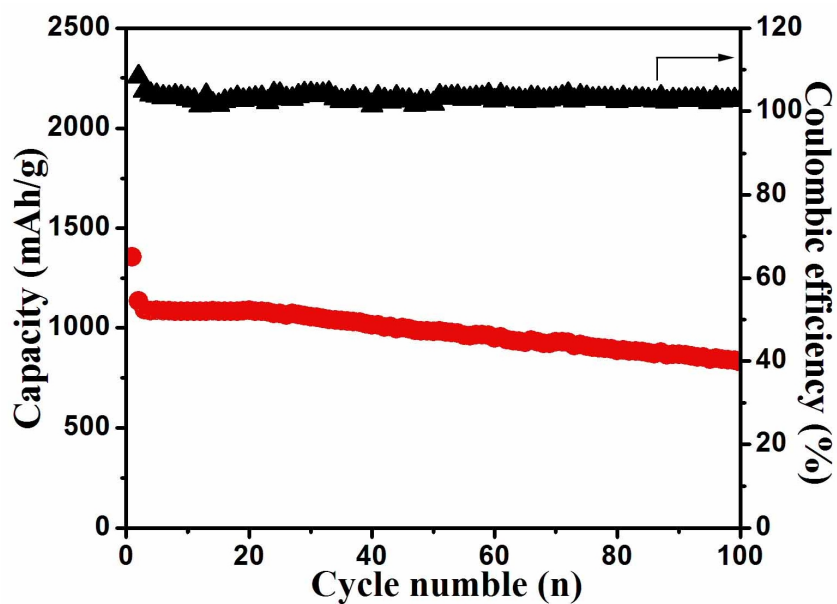

**Fig. S4.** Cycling performance of Ge@C nanostructures at 500 mAh g<sup>-1</sup> for 100 cycles (0.01 V - 1.5 V versus Li<sup>+</sup>/Li).

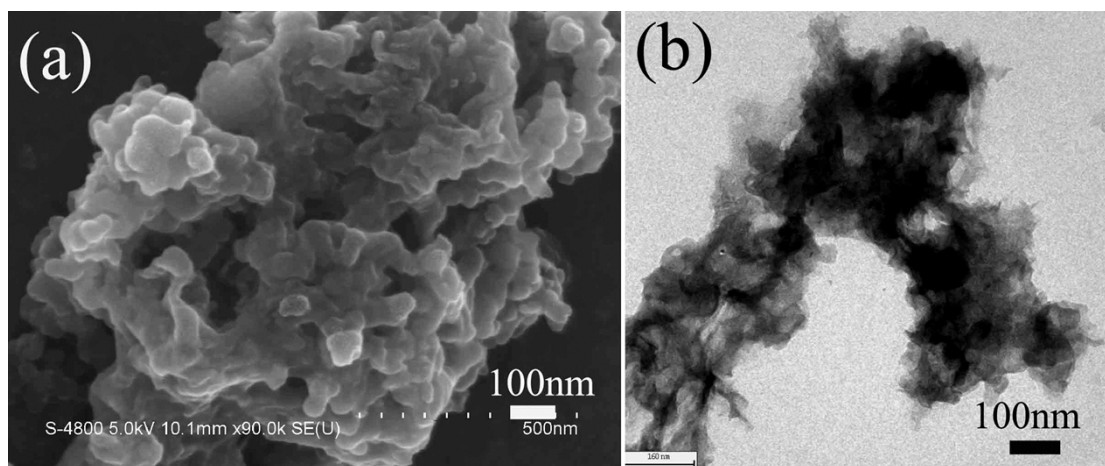

**Fig. S5.** (a) SEM and (b) TEM images of Ge@C nanocomposites electrodes cycled after 50 cycles at 500mA/g.
